# Supplementary material
Source: Springer Nature journal article supplement (https://www.springermedizin.de/resource/supplementary/12960_2010_229_MOESM1_ESM.pdf/9570690)

Number enrolled

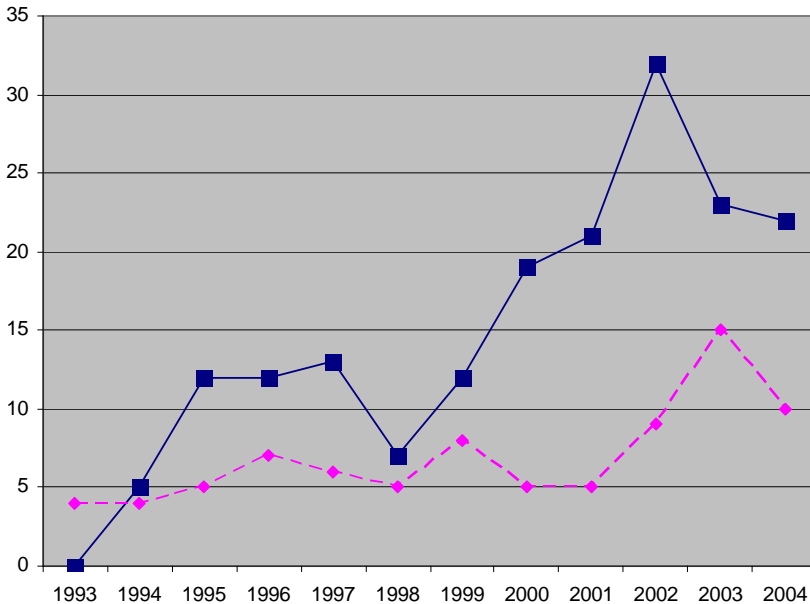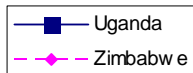

Year of enrolment

Supplement: MOESM1 [file 9570690]
